# Supplementary material for: Use of drugs for ADHD among adults—a multinational study among 15.8 million adults in the Nordic countries
Source: PubMed Central journal article supplement (PMC5110707; doi:10.1007/s00228-016-2125-y), 2016-09-01
Supplement: 228_2016_2125_MOESM1_ESM.pdf [file 228_2016_2125_MOESM1_ESM.pdf]

## Online Resource

### **Supplementary material for article in European Journal of Clinical Pharmacology**

**Title:** Use of drugs for ADHD among adults – a multinational study among 15.8 million adults in the Nordic countries

**Authors:** Øystein Karlstad, Helga Zoëga, Kari Furu, Shahram Bahmanyar, Jaana E Martikainen, Helle Kieler, Anton Pottegård

**Correspondence:** Øystein Karlstad, Department of Pharmacoepidemiology, Norwegian Institute of Public Health, P.O.box 4404 Nydalen, N-0403 Oslo, Norway.  
oystein.karlstad@fhi.no

**Supplemental Figure S1:** Annual prevalence proportion of ADHD drug use in 2012 per 1-year age group among persons aged 18-64 years, by Nordic country

**a) Men**

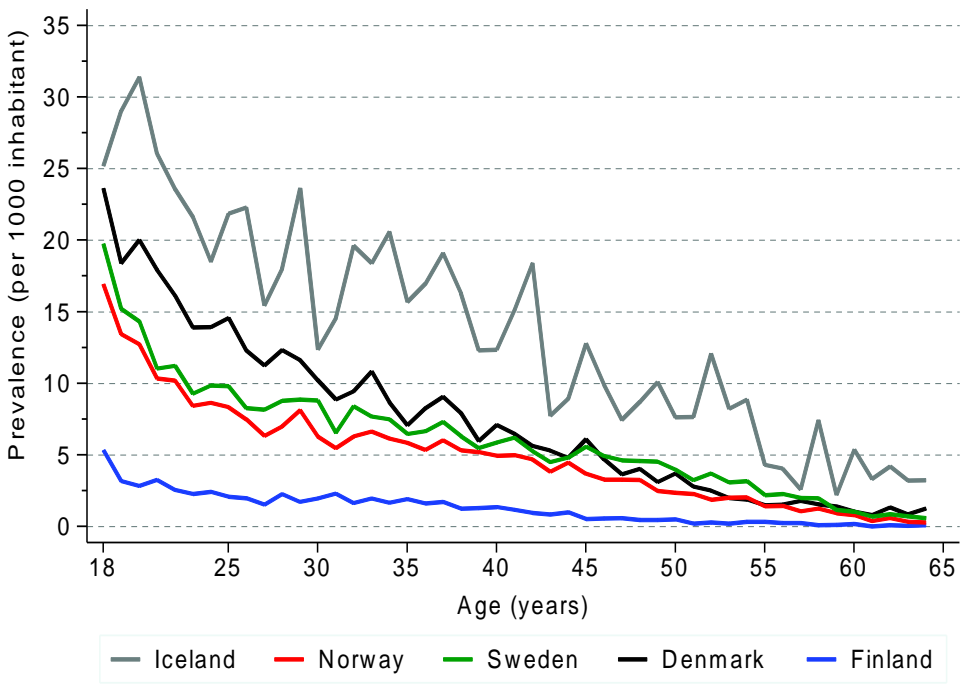

**b) Women**

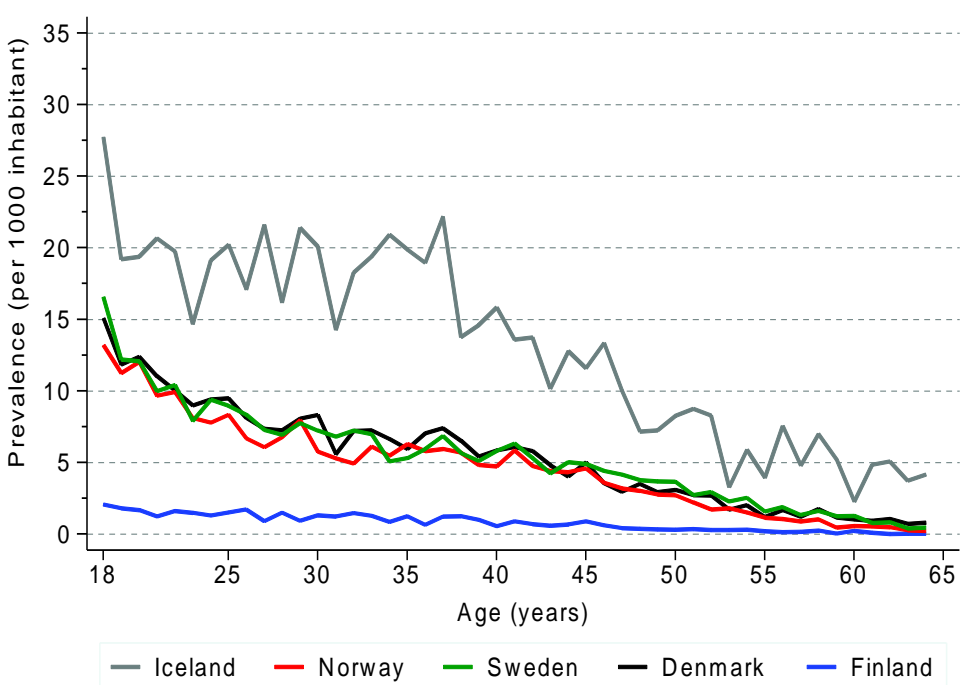

**Supplemental Figure S2:** Annual prevalence proportion of ADHD drug use during 2008-2012 among persons aged 18-64 years, by Nordic country

**a) Men**

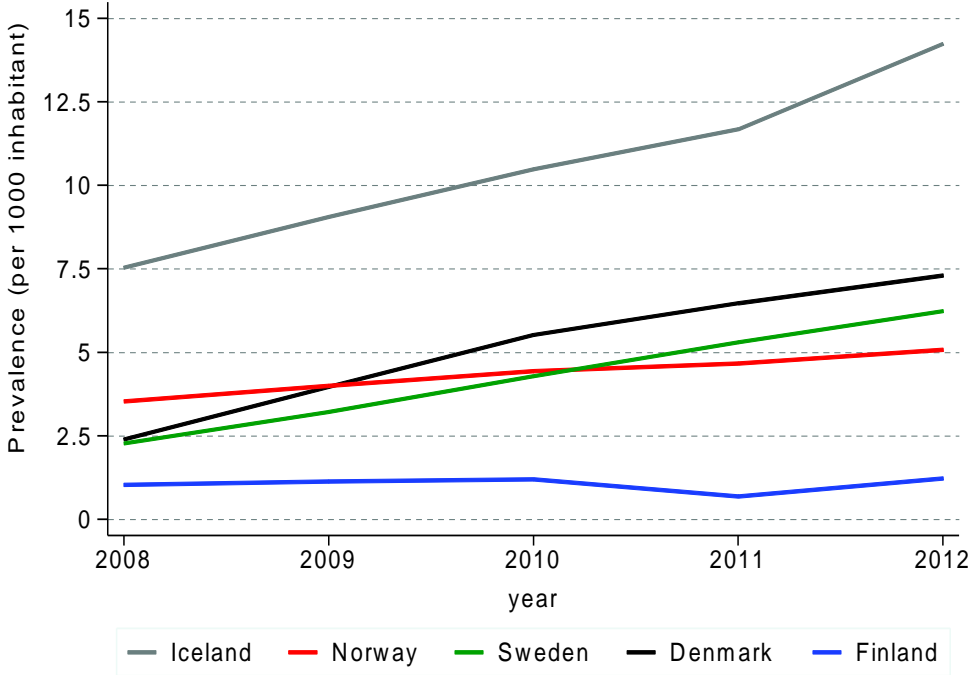

**b) Women**

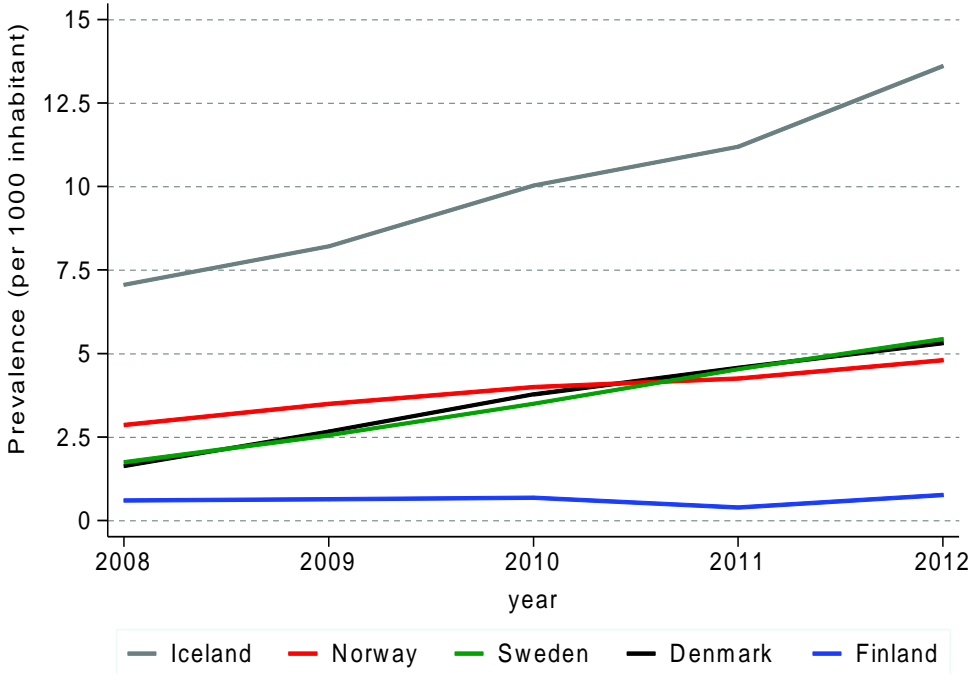

**Supplemental Figure S3:** Annual incidence of ADHD drug use during 2008-2012 among persons aged 18-64 years, by Nordic country

**a) Men**

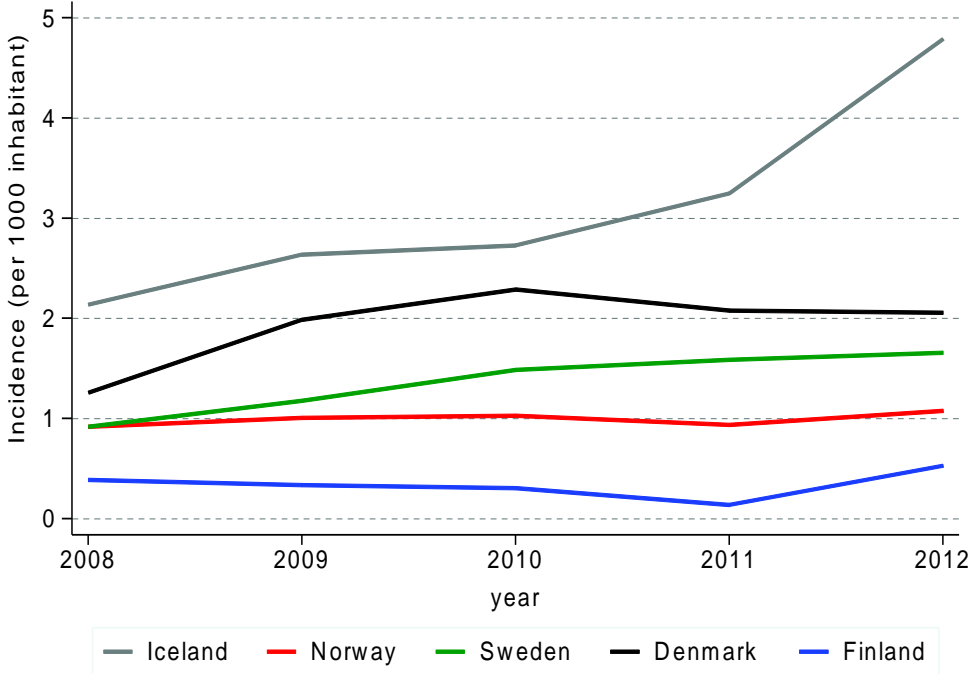

**b) Women**

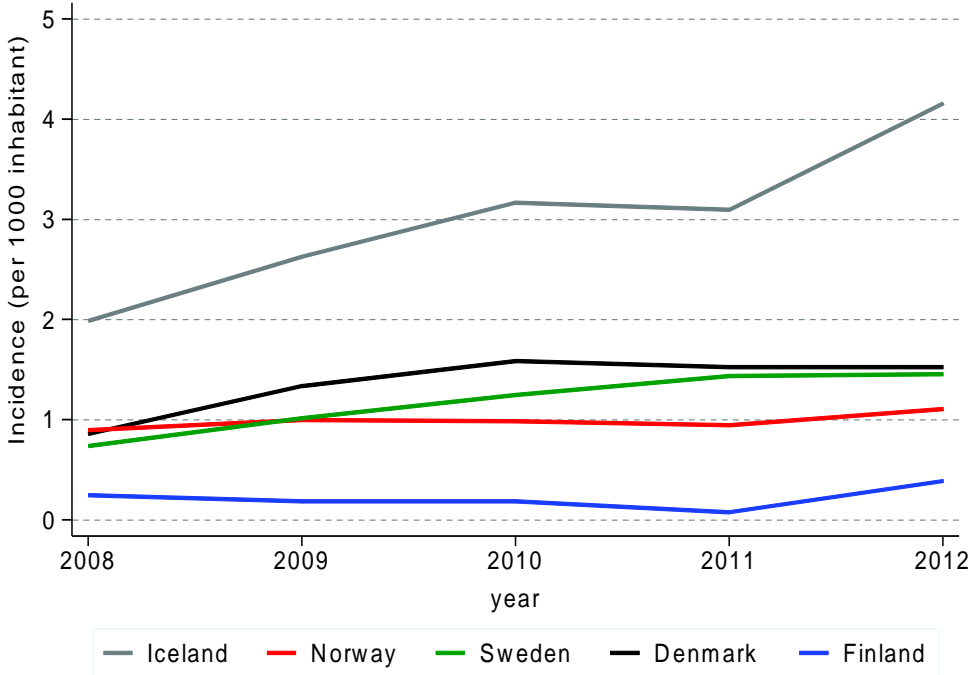

**Supplemental Figure S4:** Type of ADHD drugs used at treatment initiation during 2008-2012 among persons aged 18-64 years, by Nordic country

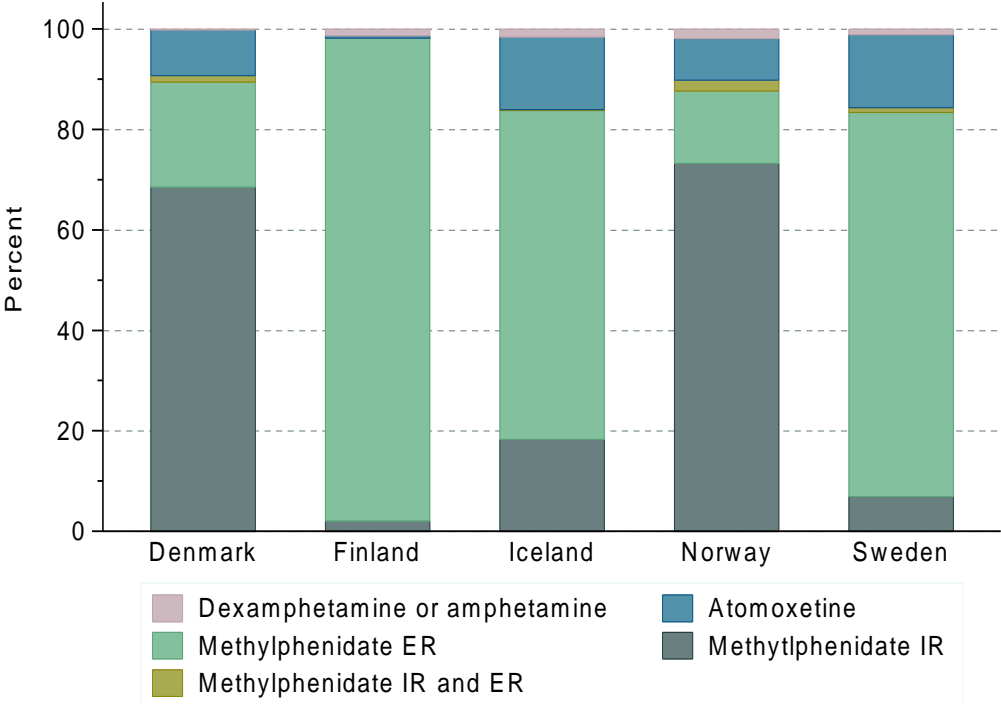

Abbreviations: IR: immediate release formulation; ER: extended release formulation.

**Supplemental Table S1:** Annual number of users (n) and prevalence proportion (n per 1000 inhabitant) of ADHD drug use among persons aged 18-64 years in 2008 and 2012, by Nordic country

| Country and year | Men    |        |        |        |       |        |       |        |        |        | Women  |        |       |        |       |        |       |        |        |        |  |  |
|------------------|--------|--------|--------|--------|-------|--------|-------|--------|--------|--------|--------|--------|-------|--------|-------|--------|-------|--------|--------|--------|--|--|
|                  | 18-24  |        | 25-34  |        | 35-44 |        | 45-64 |        | 18-64  |        | 18-24  |        | 25-34 |        | 35-44 |        | 45-64 |        | 18-64  |        |  |  |
|                  | n      | n/1000 | n      | n/1000 | n     | n/1000 | n     | n/1000 | n      | n/1000 | n      | n/1000 | n     | n/1000 | n     | n/1000 | n     | n/1000 | n      | n/1000 |  |  |
| All              |        |        |        |        |       |        |       |        |        |        |        |        |       |        |       |        |       |        |        |        |  |  |
| 2008             | 6,113  | 5.6    | 5,458  | 3.4    | 4,087 | 2.2    | 2,848 | 0.9    | 18,506 | 2.4    | 3,833  | 3.7    | 3,690 | 2.4    | 3,481 | 2.0    | 2,479 | 0.7    | 13,483 | 1.8    |  |  |
| 2012             | 14,396 | 11.9   | 11,972 | 7.3    | 9,059 | 5.1    | 7,023 | 2.1    | 42,450 | 5.3    | 10,693 | 9.3    | 9,478 | 6.0    | 8,210 | 4.8    | 6,065 | 1.8    | 34,446 | 4.4    |  |  |
| Denmark          |        |        |        |        |       |        |       |        |        |        |        |        |       |        |       |        |       |        |        |        |  |  |
| 2008             | 1,425  | 6.5    | 1,211  | 3.5    | 812   | 2.0    | 676   | 0.9    | 4,124  | 2.4    | 743    | 3.5    | 727   | 2.1    | 722   | 1.8    | 585   | 0.8    | 2,777  | 1.6    |  |  |
| 2012             | 4,453  | 17.8   | 3,591  | 11.0   | 2,627 | 6.7    | 1,875 | 2.5    | 12,546 | 7.3    | 2,712  | 11.3   | 2,433 | 7.5    | 2,266 | 5.9    | 1,623 | 2.2    | 9,034  | 5.3    |  |  |
| Finland          |        |        |        |        |       |        |       |        |        |        |        |        |       |        |       |        |       |        |        |        |  |  |
| 2008             | 444    | 1.9    | 684    | 2.0    | 398   | 1.1    | 225   | 0.3    | 1,751  | 1.0    | 239    | 1.1    | 351   | 1.1    | 233   | 0.7    | 179   | 0.2    | 1,002  | 0.6    |  |  |
| 2012             | 749    | 3.1    | 677    | 1.9    | 445   | 1.3    | 221   | 0.3    | 2,092  | 1.2    | 369    | 1.6    | 426   | 1.3    | 284   | 0.9    | 211   | 0.3    | 1,290  | 0.8    |  |  |
| Iceland          |        |        |        |        |       |        |       |        |        |        |        |        |       |        |       |        |       |        |        |        |  |  |
| 2008             | 234    | 14.2   | 199    | 7.9    | 174   | 7.5    | 173   | 4.5    | 780    | 7.5    | 146    | 9.3    | 188   | 8.4    | 171   | 8.0    | 170   | 4.7    | 675    | 7.1    |  |  |
| 2012             | 432    | 25.1   | 425    | 18.6   | 305   | 14.3   | 275   | 7.0    | 1,437  | 14.2   | 330    | 20.1   | 420   | 18.9   | 323   | 15.6   | 269   | 6.9    | 1,342  | 13.6   |  |  |
| Norway           |        |        |        |        |       |        |       |        |        |        |        |        |       |        |       |        |       |        |        |        |  |  |
| 2008             | 1,911  | 9.2    | 1,555  | 5.0    | 1,188 | 3.3    | 650   | 1.1    | 5,304  | 3.5    | 1,331  | 6.7    | 1,157 | 3.8    | 1,099 | 3.2    | 567   | 1.0    | 4,154  | 2.9    |  |  |
| 2012             | 2,725  | 11.6   | 2,259  | 6.8    | 1,884 | 5.1    | 1,197 | 1.9    | 8,065  | 5.1    | 2,313  | 10.3   | 2,011 | 6.3    | 1,852 | 5.3    | 1,106 | 1.8    | 7,282  | 4.8    |  |  |
| Sweden           |        |        |        |        |       |        |       |        |        |        |        |        |       |        |       |        |       |        |        |        |  |  |
| 2008             | 2,099  | 5.1    | 1,809  | 3.1    | 1,515 | 2.3    | 1,124 | 0.9    | 6,547  | 2.3    | 1,374  | 3.5    | 1,267 | 2.3    | 1,256 | 2.0    | 978   | 0.8    | 4,875  | 1.8    |  |  |
| 2012             | 6,037  | 13.0   | 5,020  | 8.3    | 3,798 | 5.9    | 3,455 | 2.8    | 18,310 | 6.2    | 4,969  | 11.2   | 4,188 | 7.3    | 3,485 | 5.6    | 2,856 | 2.4    | 15,498 | 5.4    |  |  |

**Supplemental Table S2:** Proportion (%) of ADHD drug users with co-medication of other psychotropic drugs in 2012 among persons aged 18-64 years, by Nordic country

|                  | Denmark | Finland | Iceland | Norway | Sweden |
|------------------|---------|---------|---------|--------|--------|
| <b>Men</b>       |         |         |         |        |        |
| Any psychotropic | 50      | 53      | 51      | 43     | 60     |
| Antidepressants  | 29      | 32      | 33      | 19     | 36     |
| Antiepileptics   | 12      | 15      | 12      | 10     | 15     |
| Antipsychotics   | 22      | 19      | 16      | 12     | 17     |
| Anxiolytics      | 8       | 17      | 17      | 16     | 21     |
| Hypnotics        | 13      | 15      | 18      | 18     | 32     |
| Melatonin        | 7       | 0       | 1       | 7      | 6      |
| Other hypnotics  | 8       | 15      | 17      | 14     | 29     |
| <b>Women</b>     |         |         |         |        |        |
| Any psychotropic | 62      | 59      | 64      | 51     | 72     |
| Antidepressants  | 47      | 43      | 46      | 26     | 49     |
| Antiepileptics   | 16      | 13      | 15      | 11     | 18     |
| Antipsychotics   | 21      | 17      | 20      | 12     | 16     |
| Anxiolytics      | 11      | 17      | 26      | 18     | 31     |
| Hypnotics        | 19      | 15      | 24      | 24     | 41     |
| Melatonin        | 10      | 0       | 2       | 10     | 7      |
| Other hypnotics  | 11      | 15      | 23      | 17     | 38     |

*Co-medication defined as filling a prescription for other psychotropic drugs within 3 months before or after filling a prescription for an ADHD drug, i.e. proportion (%) of ADHD drug users with co-medication.*
